# Supplementary material
Source: PubMed Central journal article supplement (PMC7855223)
Supplement: NIHMS1628473-supplement-Supplement_tables.pdf [file NIHMS1628473-supplement-Supplement_tables.pdf]

**SUPPLEMENTAL TABLE 1**

**Univariate and final multivariable models summarizing probability of prevalence of worse support at 1 year postpartum according to the average daily MVPA in 5-minute bouts (average of 2–3 and 5–6 weeks postpartum)**

|                                                                        | Univariate PR (95% CI) | Pvalue | Multivariable PR (95% CI) <sup>a</sup> | Pvalue |
|------------------------------------------------------------------------|------------------------|--------|----------------------------------------|--------|
| <b>MVPA in 5-min bouts</b>                                             |                        |        |                                        |        |
| Q 2, 3, 4, 2 vs Q 1                                                    | 1.53 (0.7–3.38)        | .29    | 1.39 (0.62–3.13)                       | .43    |
| Q 5 vs Q 1                                                             | 2.02 (0.85–4.81)       | .11    | 1.39 (0.56–3.43)                       | .48    |
| Age, ≥30.4 (age Q 4, 5) vs <30.4 (age Q 1, 2, 3)                       | 2.12 (1.26–3.56)       | .005   | 2.06 (1.22–3.47)                       | .007   |
| High-risk delivery factor (yes vs no)                                  | 1.43 (0.86–2.39)       | .17    | 1.02 (0.65–1.58)                       | .94    |
| Ethnicity (Hispanic vs non-Hispanic) <sup>b</sup>                      | 0.78 (0.36–1.67)       | .52    | 0.99 (0.47–2.11)                       | .99    |
| Support in third trimester (worse vs better) <sup>c</sup> <sup>b</sup> | 4.09 (2.03–8.24)       | <.001  | 3.81 (2.02–7.20)                       | <.001  |
| Education (professional vs college or less) <sup>b</sup>               | 1.36 (0.8–2.29)        | .26    | 0.80 (0.43–1.46)                       | 0.46   |
| Chronic cough at 5–10 wk postpartum (yes vs no) <sup>d</sup>           | 1.30 (0.2–8.29)        | .78    | N/A                                    | N/A    |
| Breastfeeding at 5–10 wk postpartum (yes vs no) <sup>b</sup>           | 5.00 (0.71, 35.35)     | .11    | 3.39 (0.48, 23.70)                     | .22    |
| <b>BMI at 5–10 wk postpartum<sup>b</sup></b>                           |                        |        |                                        |        |
| 25–<30 vs <25 kg/m <sup>2</sup>                                        | 0.77 (0.44, 1.35)      | .36    | 0.87 (0.49, 1.55)                      | .65    |
| ≥30 vs <25 kg/m <sup>2</sup>                                           | 0.34 (0.12, 0.94)      | .04    | 0.37 (0.13, 1.08)                      | .07    |

BMI, body mass index; CI, confidence interval; DAG, directed acyclic graph; MVPA, moderate to vigorous physical activity; N/A, not available; PR, prevalence ratio; Q, quintile.

<sup>a</sup> Final model (n=562) includes multiple imputation on missing values; <sup>b</sup> The multivariable model based on the DAG designed to test the total effect of MVPA on worse support is also appropriate to test the total effect of age and high-risk delivery factor on worse support but reflects direct or "partial" effects for the other variables after MVPA, a downstream variable, has been adjusted. The total effects of these variables include indirect effects that may be mediated via MVPA. Therefore, guided by separate DAGs to determine adjustment factors for the other variables in the above model, we created additional models designed to test the total effect of each of the other variables after adjustment. The total effects of these other variables are as follows: Ethnicity: PR 0.96 (95% CI, 0.46–2.04), P=.93 (adjusted for age, high-risk delivery factor, antenatal support, education, breastfeeding at 5–10 weeks postpartum, BMI at 5–10 weeks postpartum). Antenatal support: PR 3.81 (95% CI, 1.98–7.34), P<.001 (adjusted for age, high-risk delivery factor, ethnicity, education, breastfeeding at 5–10 weeks postpartum, BMI at 5–10 weeks postpartum). Education: PR 0.83 (95% CI, 0.46–1.51), P=.55 (adjusted for age, high-risk delivery factor, antenatal support, ethnicity, breastfeeding at 5–10 weeks postpartum, BMI at 5–10 weeks postpartum). Breastfeeding at 5–10 weeks postpartum: PR 3.64 (95% CI, 0.52–25.43), P=.19 (adjusted for age, high-risk delivery factor, antenatal support, ethnicity, education, BMI at 5–10 weeks postpartum). BMI: PR 0.76 (95% CI, 0.37–1.57), P=.47 for 25 to <30 vs <25 kg/m<sup>2</sup>, and PR 0.26 (95% CI, 0.07–0.93), P=.04 for ≥30 vs <25 kg/m<sup>2</sup> (adjusted for age, high-risk delivery factor, antenatal support, ethnicity, breastfeeding at 5–10 weeks postpartum, education, prepregnancy BMI); <sup>c</sup> Worse=maximal vaginal descent of ≥0 cm; Better=maximal vaginal descent of <0 cm; <sup>d</sup> Omitted from multivariable model because of small cell counts.

Nygaard et al. Postpartum pelvic floor health and physical activity. Am J Obstet Gynecol 2020.

**SUPPLEMENTAL TABLE 2**

**Univariate and final multivariable models summarizing the probability of prevalence of symptom burden outcome at 1 year postpartum according to the average daily MVPA in 5-minute bouts (average of 2–3 and 5–6 weeks postpartum)**

|                                                                     | Univariate PR (95% CI) | Pvalue | Multivariable PR (95% CI) <sup>a</sup> | Pvalue |
|---------------------------------------------------------------------|------------------------|--------|----------------------------------------|--------|
| MVPA in 5-min bouts, averaged at 2–3 and 5–6 wk postpartum          |                        |        |                                        |        |
| Q 2, 3, 4 vs Q 1                                                    | 0.98 (0.82–1.18)       | .85    | 0.99 (0.84–1.18)                       | .95    |
| Q 5 vs Q 1                                                          | 0.88 (0.69–1.11)       | .27    | 0.89 (0.71–1.13)                       | .34    |
| Age, per 5 y                                                        | 1.03 (0.96–1.1)        | .46    | 1.00 (0.98–1.02)                       | .82    |
| High-risk delivery factor (yes vs no)                               | 1.19 (1.03–1.37)       | .02    | 1.21 (1.03–1.43)                       | .02    |
| Ethnicity (Hispanic vs non-Hispanic) <sup>b</sup>                   | 0.77 (0.61–0.97)       | .03    | 0.81 (0.65–1.00)                       | .05    |
| SUI, UUI, or AI in third trimester (present vs absent) <sup>b</sup> | 1.93 (1.61–2.33)       | <.001  | 1.92 (1.60–2.31)                       | <.001  |
| Education (professional vs college or less) <sup>b</sup>            | 0.95 (0.81–1.12)       | 0.57   | 0.90 (0.76–1.07)                       | 0.23   |
| Chronic cough at 5–10 wk postpartum (yes vs no) <sup>c</sup>        | 0.52 (0.16–1.69)       | .28    | N/A                                    | N/A    |
| Breastfeeding at 5–10 wk postpartum (yes vs no) <sup>b</sup>        | 1.04 (0.81–1.34)       | .75    | 0.97 (0.76–1.24)                       | .818   |
| BMI at 5–10 wk postpartum <sup>b</sup>                              |                        |        |                                        |        |
| 25–<30 vs <25 kg/m <sup>2</sup>                                     | 1.05 (0.89–1.24)       | .54    | 1.01 (0.86–1.19)                       | .929   |
| ≥30 vs <25 kg/m <sup>2</sup>                                        | 1.05 (0.86–1.28)       | .63    | 1.03 (0.86–1.24)                       | .731   |

AI, anal incontinence; BMI, body mass index; CI, confidence interval; DAG, directed acyclic graph; MVPA, moderate to vigorous physical activity; N/A, not available; PR, prevalence ratio; Q, quintile; SUI, stress urinary incontinence; UUI, urgency urinary incontinence.

<sup>a</sup> Final model (n=609) includes multiple imputation on missing values; <sup>b</sup> The multivariable model based on the DAG designed to test the total effect of MVPA on symptom burden is also appropriate to test the total effect of age and high-risk delivery factor on worse support, but reflects direct or “partial” effects for the other variables after MVPA, a downstream variable, has been adjusted. The total effects of these variables include indirect effects that may be mediated via MVPA. Therefore, guided by separate DAGs to determine adjustment factors for the other variables in the above model, we created additional models designed to test the total effect of each of the other variables after adjustment. The total effects of these other variables are as follows: Ethnicity: PR 0.80 (95% CI, 0.64–0.99), *P*=.04 (adjusted for age; high-risk delivery factor; antenatal SUI, UUI, or AI; education; breastfeeding at 5–10 weeks postpartum; BMI at 5–10 weeks postpartum). Antenatal SUI, UUI, or AI: PR 1.94 (95% CI, 1.61–2.33), *P*<.001 (adjusted for age, high-risk delivery factor, antenatal support, ethnicity, education, breastfeeding at 5–10 weeks postpartum, BMI at 5–10 weeks postpartum). Education: PR 0.90 (95% CI, 0.76–1.06), *P*=.21 (adjusted for age; high-risk delivery factor; antenatal SUI, UUI or AI; ethnicity; breastfeeding at 5–10 weeks postpartum; BMI at 5–10 weeks postpartum). Breastfeeding at 5–10 weeks postpartum: PR 0.95 (95% CI, 0.75–1.20), *P*=.66 (adjusted for age; high-risk delivery factor; antenatal SUI, UUI, or AI; ethnicity; education; BMI at 5–10 weeks postpartum). BMI at 5–10 weeks postpartum: PR 1.01 (95% CI, 0.84–1.21), *P*=.95 for 25 to <30 vs <25 kg/m<sup>2</sup>, and PR 1.02 (95% CI, 0.76–1.37), *P*=.91 for ≥30 vs <25 kg/m<sup>2</sup> (adjusted for age; high-risk delivery factor; antenatal SUI, UUI or AI; ethnicity; breastfeeding; education; prepregnancy BMI); <sup>c</sup> Omitted from multivariable model because of small cell counts.

Nygaard et al. Postpartum pelvic floor health and physical activity. *Am J Obstet Gynecol* 2020.

**SUPPLEMENTAL TABLE 3**

**Post hoc comparison of physical activity and other factors according to quintiles of MVPA in early postpartum**

|                                                                                             | Quintiles of MVPA |             |             | Pvalue |
|---------------------------------------------------------------------------------------------|-------------------|-------------|-------------|--------|
|                                                                                             | 1, 2              | 3, 4        | 5           |        |
| RAPA score before pregnancy (recall)                                                        | N (%)             | N (%)       | N (%)       | .11    |
| Sedentary                                                                                   | 1 (0.45)          | 3 (1.34)    | 0           |        |
| Underactive                                                                                 | 107 (47.77)       | 96 (42.86)  | 39 (34.82)  |        |
| Active                                                                                      | 116 (51.79)       | 125 (55.80) | 73 (65.18)  |        |
| RAPA score at third trimester                                                               |                   |             |             | .10    |
| Sedentary                                                                                   | 12 (5.36)         | 7 (3.13)    | 2 (1.79)    |        |
| Underactive                                                                                 | 173 (77.23)       | 162 (72.32) | 79 (70.54)  |        |
| Active                                                                                      | 39 (17.41)        | 55 (24.55)  | 31 (27.68)  |        |
| Self-reported heavy lifting or work in third trimester                                      |                   |             |             | .88    |
| No                                                                                          | 154 (68.75)       | 149 (66.52) | 75 (67.57)  |        |
| Yes                                                                                         | 70 (31.25)        | 75 (33.48)  | 36 (32.43)  |        |
| Activities involving hard running or straining in third trimester                           |                   |             |             | .17    |
| No                                                                                          | 215 (95.98)       | 208 (92.86) | 102 (91.07) |        |
| Yes                                                                                         | 9 (4.02)          | 16 (7.14)   | 10 (8.93)   |        |
| Activities involving some bouncing or easy running and/or greater effort in third trimester |                   |             |             | .25    |
| No                                                                                          | 171 (76.34)       | 171 (76.34) | 77 (68.75)  |        |
| Yes                                                                                         | 53 (23.66)        | 53 (23.66)  | 35 (31.25)  |        |
| Activities not involving bouncing, jumping, straining, or heavy lifting in third trimester  |                   |             |             | .51    |
| No                                                                                          | 42 (18.83)        | 33 (14.80)  | 18 (16.07)  |        |
| Yes                                                                                         | 181 (81.17)       | 190 (85.20) | 94 (83.93)  |        |
| Injured as result of physical activity during pregnancy                                     |                   |             |             | .70    |
| No                                                                                          | 165 (95.38)       | 166 (97.08) | 89 (95.70)  |        |
| Yes                                                                                         | 8 (4.62)          | 5 (2.92)    | 4 (4.30)    |        |
| Pattern of physical activity (per RAPA) between pre-pregnancy and 5–10 wk postpartum        |                   |             |             | .001   |
| Sedentary/underactive pre-pregnancy and sedentary/underactive postpartum                    | 97 (45.54)        | 82 (37.79)  | 32 (29.91)  |        |
| Sedentary/underactive pre-pregnancy and active postpartum                                   | 8 (3.76)          | 12 (5.53)   | 5 (4.67)    |        |
| Active pre-pregnancy and sedentary/underactive postpartum                                   | 86 (40.38)        | 70 (32.26)  | 42 (39.25)  |        |
| Active pre-pregnancy and active postpartum                                                  | 22 (10.33)        | 53 (24.42)  | 28 (26.17)  |        |
| Urgency urinary incontinence at 5–10 wk postpartum                                          |                   |             |             | .83    |
| No                                                                                          | 172 (80.37)       | 173 (79.36) | 88 (82.24)  |        |
| Yes                                                                                         | 42 (19.63)        | 45 (20.64)  | 19 (17.76)  |        |
| BMI at 5–10 wk postpartum                                                                   |                   |             |             | .66    |
| <25 kg/m <sup>2</sup>                                                                       | 98 (44.34)        | 111 (50.00) | 54 (50.47)  |        |
| 25–<30 kg/m <sup>2</sup>                                                                    | 79 (35.75)        | 71 (31.98)  | 37 (34.58)  |        |

**SUPPLEMENTAL TABLE 3**

**Post hoc comparison of physical activity and other factors according to quintiles of MVPA in early postpartum** (continued)

|                                                                                | Quintiles of MVPA |             |             | P value |
|--------------------------------------------------------------------------------|-------------------|-------------|-------------|---------|
|                                                                                | 1, 2              | 3, 4        | 5           |         |
| ≥30 kg/m <sup>2</sup>                                                          | 44 (19.91)        | 40 (18.02)  | 16 (14.95)  |         |
| SUI at 5–10 wk postpartum                                                      |                   |             |             | .40     |
| No                                                                             | 146 (68.54)       | 152 (69.72) | 81 (75.70)  |         |
| Yes                                                                            | 67 (31.46)        | 66 (30.28)  | 26 (24.30)  |         |
| AI at 5–10 wk postpartum                                                       |                   |             |             | .24     |
| No                                                                             | 155 (72.43)       | 173 (79.36) | 80 (74.77)  |         |
| Yes                                                                            | 59 (27.57)        | 45 (20.64)  | 27 (25.23)  |         |
| UI affects ability to do household chores postpartum at 5–10 wk postpartum     |                   |             |             | .12     |
| No                                                                             | 142 (66.36)       | 154 (70.97) | 82 (77.36)  |         |
| Yes                                                                            | 72 (33.64)        | 63 (29.03)  | 24 (22.64)  |         |
| UI affects ability to do physical recreation postpartum at 5–10 wk postpartum  |                   |             |             | .53     |
| No                                                                             | 137 (64.93)       | 141 (64.98) | 75 (70.75)  |         |
| Yes                                                                            | 74 (35.07)        | 76 (35.02)  | 31 (29.25)  |         |
| Sensation of vaginal bulge at 5–10 wk postpartum                               |                   |             |             | .24     |
| No                                                                             | 194 (91.94)       | 208 (95.85) | 100 (93.46) |         |
| Yes                                                                            | 17 (8.06)         | 9 (4.15)    | 7 (6.54)    |         |
| Work status at 5–10 wk postpartum                                              |                   |             |             | .61     |
| Other (maternity leave, homemaker, student, etc)                               | 177 (82.71)       | 185 (84.86) | 93 (86.92)  |         |
| Working part-time (<30 h/wk)                                                   | 17 (7.94)         | 14 (6.42)   | 9 (8.41)    |         |
| Working full-time                                                              | 20 (9.35)         | 19 (8.72)   | 5 (4.67)    |         |
| Breastfeeding at 5–10 wk postpartum                                            |                   |             |             | .63     |
| No                                                                             | 20 (9.39)         | 21 (9.63)   | 7 (6.54)    |         |
| Yes                                                                            | 193 (90.61)       | 197 (90.37) | 100 (93.46) |         |
| Injured as result of physical activity between delivery and 5–10 wk postpartum |                   |             |             | .35     |
| No                                                                             | 184 (99.46)       | 191 (99.48) | 96 (97.96)  |         |
| Yes                                                                            | 1 (0.54)          | 1 (0.52)    | 2 (2.04)    |         |
| RAPA score at 5–10 wk postpartum                                               |                   |             |             | <.001   |
| Sedentary                                                                      | 10 (4.67)         | 5 (2.29)    | 3 (2.80)    |         |
| Underactive                                                                    | 174 (81.31)       | 148 (67.89) | 71 (66.36)  |         |
| Active                                                                         | 30 (14.02)        | 65 (29.82)  | 33 (30.84)  |         |
| Self-reported heavy lifting or work at 5–10 wk postpartum                      |                   |             |             | .007    |
| No                                                                             | 171 (79.91)       | 148 (68.20) | 71 (66.36)  |         |
| Yes                                                                            | 43 (20.09)        | 69 (31.80)  | 36 (33.64)  |         |

**SUPPLEMENTAL TABLE 3**

**Post hoc comparison of physical activity and other factors according to quintiles of MVPA in early postpartum** (continued)

|                                                                                                | Quintiles of MVPA |              |              | P value |
|------------------------------------------------------------------------------------------------|-------------------|--------------|--------------|---------|
|                                                                                                | 1, 2              | 3, 4         | 5            |         |
| Activities involving hard running or straining at 5–10 wk postpartum                           |                   |              |              | .002    |
| No                                                                                             | 194 (90.65)       | 177 (81.94)  | 82 (76.64)   |         |
| Yes                                                                                            | 20 (9.35)         | 39 (18.06)   | 25 (23.36)   |         |
| Activities involving some bouncing or easy running and/or greater effort at 5–10 wk postpartum |                   |              |              | .037    |
| No                                                                                             | 147 (68.69)       | 130 (59.91)  | 59 (55.14)   |         |
| Yes                                                                                            | 67 (31.31)        | 87 (40.09)   | 48 (44.86)   |         |
| Activities not involving bouncing, jumping, straining, or heavy lifting at 5–10 wk postpartum  |                   |              |              | .004    |
| No                                                                                             | 71 (33.49)        | 44 (20.28)   | 23 (21.50)   |         |
| Yes                                                                                            | 141 (66.51)       | 173 (79.72)  | 84 (78.50)   |         |
| Self-rated health, last 7 d, at 5–10 wk postpartum                                             |                   |              |              | .06     |
| Excellent                                                                                      | 31 (14.49)        | 44 (20.18)   | 24 (22.43)   |         |
| Very good                                                                                      | 86 (40.19)        | 89 (40.83)   | 52 (48.60)   |         |
| Good                                                                                           | 74 (34.58)        | 72 (33.03)   | 29 (27.10)   |         |
| Fair                                                                                           | 20 (9.35)         | 12 (5.50)    | 2 (1.87)     |         |
| Poor                                                                                           | 3 (1.40)          | 1 (0.46)     | 0            |         |
| Total average ENMO at 2–3 and 5–6 wk postpartum <sup>a</sup> , mg, mean (SD)                   | 18.83 (2.43)      | 23.98 (2.43) | 29.04 (3.71) | <.001   |
| At least 1 5-min bout of MVPA at 2–3 and 5–6 wk postpartum                                     |                   |              |              | <.001   |
| No                                                                                             | 73 (32.44)        | 26 (11.56)   | 1 (0.89)     |         |
| Yes                                                                                            | 152 (67.56)       | 199 (88.44)  | 111 (99.11)  |         |
| At least 1 5-min bout of vigorous physical activity at 2–3 and 5–6 wk postpartum               |                   |              |              | <.001   |
| No                                                                                             | 219 (97.33)       | 191 (84.89)  | 90 (80.36)   |         |
| Yes                                                                                            | 6 (2.67)          | 34 (15.11)   | 22 (19.64)   |         |

AI, anal incontinence; BMI, body mass index; ENMO, Euclidean Norm Minus One; mg, milli-gravity; MVPA, moderate to vigorous physical activity; RAPA, Rapid Assessment of Physical Activity scale; SLI, stress urinary incontinence; UI, urinary incontinence.

<sup>a</sup> ENMO is a summary metric for acceleration data and represents the vector magnitude of 3 axial measures minus the contribution of gravity.

Nygaard et al. Postpartum pelvic floor health and physical activity. *Am J Obstet Gynecol* 2020.
